# Supplementary material
Source: PubMed Central journal article supplement (PMC5109833)
Supplement: NIHMS828572-supplement-Supplemental.pdf [file NIHMS828572-supplement-Supplemental.pdf]

## Supporting Information

### Targeting the Src homology 2 (SH2) domain of signal transducer and activator of transcription 6 (STAT6) with cell-permeable, phosphatase-stable phosphopeptide mimics potently inhibits activation and transcriptional activity.

Pijus K. Mandal,<sup>1</sup> Pietro Morlacchi,<sup>1</sup> J. Morgan Knight,<sup>1</sup> Todd M. Link,<sup>2</sup> Gilbert R. Lee, IV,<sup>2</sup> Roza Nurieva,<sup>3</sup> Divyendu Singh,<sup>3</sup> Ankur Dhanik,<sup>4</sup> Lydia Kavraki<sup>4</sup>, David B. Corry,<sup>5</sup> John E. Ladbury,<sup>2</sup> John S. McMurray<sup>1\*</sup>

<sup>1</sup>Department of Experimental Therapeutics, <sup>2</sup>Department of Biochemistry and Molecular Biology, Center for Biomolecular Structure and Function, <sup>3</sup>Department of Immunology, The University of Texas M. D. Anderson Cancer Center, Houston, Texas, <sup>4</sup>The Department of Computer Science, Rice University, Houston, Texas, <sup>5</sup>Departments of Medicine and Pathology & Immunology, The Baylor College of Medicine, Houston, Texas

|                                                                                 |    |
|---------------------------------------------------------------------------------|----|
| Table S1. Characterization of phosphopeptides assayed for binding to STAT6..... | S2 |
| Table S2. Characterization of phosphate analogs of <b>17</b> .....              | S3 |
| Table S3. Yields and characterization of prodrug analogs of <b>17</b> .....     | S4 |
| Figure S1. Inhibition of pSTAT6 and pAkt in MDA-MB-468 breast cancer cells..... | S5 |
| Figure S2. Inhibition of STAT proteins in CD4 <sup>+</sup> T lymphocytes.....   | S6 |
| NMR Characterization of <b>19c</b> .....                                        | S7 |
| NMR Characterization of <b>31</b> .....                                         | S8 |

**Table S1.** Characterization of phosphopeptides assayed for binding to STAT6.

| #  | Phosphopeptide                                                        | (M+H)<br>Calcd | (M+H)<br>Found | HPLC<br>RT<br>(min) <sup>a</sup> | Yield<br>(mg) |
|----|-----------------------------------------------------------------------|----------------|----------------|----------------------------------|---------------|
| 1  | Ac-pTyr-Lys-Pro-Phe-Gln-Asp-Leu-Ile-NH <sub>2</sub>                   | 1144.5444      | 1144.5484      | 25.4                             | 91            |
| 2  | Ac-pTyr-Lys-Pro-Phe-Gln-Asp-Leu-NH <sub>2</sub>                       | 1031.4603      | 1031.4668      | 21.4                             | 48            |
| 3  | Ac-pTyr-Lys-Pro-Phe-Gln-Asp-NH <sub>2</sub>                           | 918.3763       | 918.3787       | 16.4                             | 75            |
| 4  | Ac-pTyr-Lys-Pro-Phe-Gln-NH <sub>2</sub>                               | 803.3493       | 803.3534       | 16.1                             | 50            |
| 5  | Ac-pTyr-Lys-Pro-Phe-NH <sub>2</sub>                                   | 675.2907       | 675.2950       | 17.17                            | 63            |
| 6  | Ac-pTyr-Lys-Pro-NH <sub>2</sub>                                       | 528.2223       | 528.2234       | 9.33                             | 28            |
| 7  | Ac-pTy-Tle-Pro-Phe-NH <sub>2</sub>                                    | 660.2798       | 660.2880       | 21.73                            | 46            |
| 8  | Ac-pTy-Nle-Pro-Phe-NH <sub>2</sub>                                    | 660.2798       | 660.2863       | 24.07                            | 31            |
| 9  | Ac-pTy-Ala-Pro-Phe-NH <sub>2</sub>                                    | 618.2329       | 618.2415       | 18.40                            | 39            |
| 10 | PhCH <sub>2</sub> CH <sub>2</sub> CO-pTyr-Lys-Pro-Phe-NH <sub>2</sub> | 765.3377       | 765.3385       | 24.16                            | 63            |
| 11 | PhCH <sub>2</sub> CO-pTyr-Lys-Pro-Phe-NH <sub>2</sub>                 | 751.3220       | 751.3241       | 22.52                            | 58            |
| 12 | PhCO-pTyr-Lys-Pro-Phe-NH <sub>2</sub>                                 | 737.3064       | 737.3081       | 21.66                            | 71            |
| 13 | PhCH=CHCO-pTyr-Lys-Pro-Phe-NH <sub>2</sub>                            | 763.3220       | 763.3239       | 24.92                            | 42            |
| 14 | pCinn-Lys-Pro-Phe-NH <sub>2</sub>                                     | 616.2536       | 616.2521       | 17.9                             | 49            |
| 15 | p-Indole-Lys-Pro-Phe-NH <sub>2</sub>                                  | 629.2489       | 629.2490       | 18.17                            | 32            |
| 16 | p-Benzofuran-Lys-Pro-Phe-NH <sub>2</sub>                              | 630.2329       | 630.2324       | 18.04                            | 71            |

<sup>a</sup> Peptides were tested for purity by reverse phase HPLC on a Waters Alliance HPLC using a Phenomenex Luna C18 (2) 5 $\mu$ M 2.1 x 250 mm column. A gradient of 0-40% MeCN/30 min at a flow rate of 0.4 mL/min was used with both mobile phases containing 0.1% TFA. Elution was monitored at 230 nm, 254 nm, and 275 nm.

**Table S2.** Characterization of phosphate analogs of **17**.

|            | Sequence                                                                                     | Yield<br>mg | %<br>Yield | HRMS<br>(M+H)<br>Calcd | HRMS<br>(M+H)<br>Found | HPLC<br>RT<br>(min) <sup>a</sup> |
|------------|----------------------------------------------------------------------------------------------|-------------|------------|------------------------|------------------------|----------------------------------|
| <b>18a</b> | pCinn-Tle-Pro-N(4-I-Ph)(Ph)                                                                  | 35          | 47         | 732.1336               | 732.1333               | 22.5                             |
| <b>19a</b> | βMpCinn-Tle-Pro-N(4-I-Ph)(Ph)                                                                | 39          | 53         | 746.1492               | 746.1458               | 22.8                             |
| <b>20</b>  | pInd-Tle-Pro-N(4-I-Ph)(Ph)                                                                   | 61          | 72         | 745.1288               | 745.1273               | 22.13                            |
| <b>18b</b> | pCinn-Tle-Pro-NPh <sub>2</sub>                                                               | 23          | 39         | 606.2369               | 606.2350               | 18.4                             |
| <b>18c</b> | pCinn-Tle-Pro-N(Me)(Ph)                                                                      | 41          | 27         | 544.22                 | 544.20                 | 26.7                             |
| <b>18d</b> | pCinn-Tle-Pro-NHPh                                                                           | 34          | 22         | 530.21                 | 530.25                 | 30.3                             |
| <b>19b</b> | βMpCinn-Tle-Pro-NPh <sub>2</sub>                                                             | 31          | 51         | 620.2526               | 620.2510               | 19.46                            |
| <b>19c</b> | βMpCinn-Tle-Pro-N(Me)(Ph)                                                                    | 29          | 56         | 558.2369               | 558.2373               | 15.13                            |
| <b>19d</b> | βMpCinn-Tle-Pro-NHPh                                                                         | 25          | 48         | 544.2213               | 544.2181               | 17.2                             |
| <b>19e</b> | βMpCinn-Tle-Pro-NHCH <sub>2</sub> Ph                                                         | 27          | 51         | 558.2369               | 558.2336               | 16.01                            |
| <b>19f</b> | βMpCinn-Tle-Pro-NHCH <sub>2</sub> CH <sub>2</sub> Ph                                         | 31          | 53         | 572.2526               | 572.2526               | 16.57                            |
| <b>19g</b> | βMpCinn-Tle-Pro-N(Me)(C <sub>6</sub> H <sub>11</sub> )                                       | 37          | 67         | 564.2839               | 564.2842               | 17.5                             |
| <b>19h</b> | βMpCinn-Tle-Pro-N(CH <sub>3</sub> ) <sub>2</sub>                                             | 30          | 61         | 496.2213               | 496.2191               | 10.7                             |
| <b>19i</b> | βMpCinn-Tle-Pro-N(C <sub>2</sub> H <sub>5</sub> ) <sub>2</sub>                               | 27          | 52         | 524.2526               | 524.2502               | 12.00                            |
| <b>21</b>  | βMpCinn-Tle-Sar-N(Me)(Ph)                                                                    | 22          | 42         | 532.2213               | 532.2186               | 15.92                            |
| <b>22</b>  | βMpCinn-Tle-Ala-N(Me)(Ph)                                                                    | 31          | 59         | 532.2213               | 532.2184               | 15.15                            |
| <b>23</b>  | βMpCinn-Tle-N(Me)Ala-N(Me)(Ph)                                                               | 30          | 55         | 546.2369               | 546.2189               | 24.4                             |
| <b>24</b>  | βMpCinn-Tle-pyrrolidine-2-CH=CHPh                                                            | 22          | 40         | 527.2311               | 527.2312               | 20.47                            |
| <b>25</b>  | βMpCinn-Tle-pyrrolidine-2-CH=CHCH <sub>2</sub> CH <sub>2</sub> Ph                            | 19          | 35         | 555.2624               | 555.2867               | 24.52                            |
| <b>26</b>  | βMpCinn-Tle-pyrrolidine-2-CH <sub>2</sub> CH <sub>2</sub> CH <sub>2</sub> CH <sub>2</sub> Ph | 16          | 30         | 557.2780               | 557.2827               | 25.52                            |
| <b>27</b>  | βMpCinn-Tle-pyrrolidine-2-CH <sub>2</sub> N(Me)Ph                                            | 44          | 31         | 544.25                 | 544.35                 | 28.14                            |

<sup>a</sup> Peptides were tested for purity by reverse phase HPLC on a Waters Alliance HPLC using a Phenomenex Luna C18 (2) 5μM 2.1 x 250 mm column. A gradient of 0-40% MeCN/30 min at a flow rate of 0.4 mL/min was used with both mobile phases containing 0.1% TFA. Elution was monitored at 230 nm, 254 nm, and 275 nm.

**Table S3.** Yields and characterization of prodrug analogs of **1**.

| #         | Structure                                                                   | Yield (mg) | % Yield | (M+H) Calcd | (M+H) Found | HPLC RT (min) <sup>a</sup> |
|-----------|-----------------------------------------------------------------------------|------------|---------|-------------|-------------|----------------------------|
| <b>17</b> | F2PmCinn(POM <sub>2</sub> )-Tle-Pro-N(4-I-Ph)(Ph)                           | 64         | 66      | 994.2716    | 994.2753    | 35.03                      |
| <b>28</b> | F2PmCinn(POM <sub>2</sub> )-Tle-Pro-NPh <sub>2</sub>                        | 63         | 58      | 868.3750    | 868.3753    | 35.6                       |
| <b>29</b> | F2PmCinn(POM <sub>2</sub> )-Tle-Pro-N(Me)(Ph)                               | 56         | 53      | 806.3593    | 806.3578    | 31.2                       |
| <b>30</b> | F2PmCinn(POM <sub>2</sub> )-Tle-Pro-NHPH                                    | 49         | 38      | 792.3437    | 792.3463    | 33.2                       |
| <b>31</b> | βMF2PmCinn(POM <sub>2</sub> )-Tle-Pro-N(Me)Ph                               | 56         | 53      | 820.3750    | 820.3746    | 34.73                      |
| <b>32</b> | βMF2PmCinn(POM <sub>2</sub> )-Tle-Pro-N(Me)(C <sub>6</sub> H <sub>5</sub> ) | 48         | 45      | 826.4219    | 826.3944    | 33.77                      |

<sup>a</sup> Prodrugs were tested for purity by reverse phase HPLC on a Waters Alliance HPLC using a Phenomenex Luna C18 (2) 5μM 2.1 x 250 mm column. A gradient of 10-80% MeCN/30 min at a flow rate of 0.4 mL/min was used. Elution was monitored at 230 nm, 254 nm, and 275 nm.

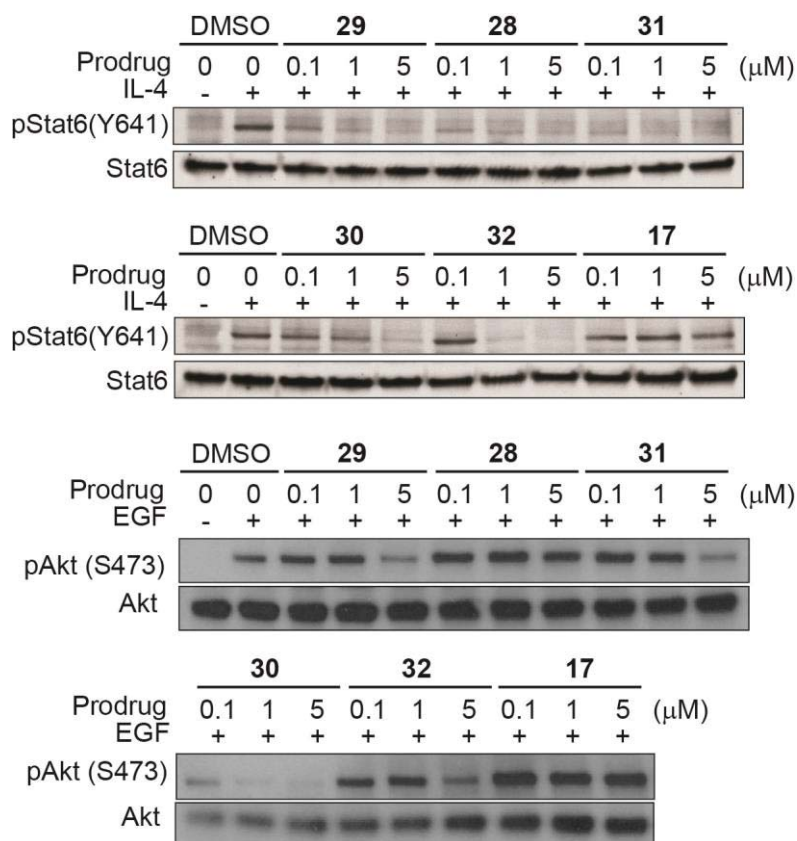

**Figure S1.** Inhibition of STAT6 and Akt phosphorylation in MDA-MB-468 breast cancer cells.

Cells were serum starved overnight and were treated with prodrugs for 2 h. IL-4 or EGF were added and total and phosphoprotein levels were determined by western blot after 1 hr.

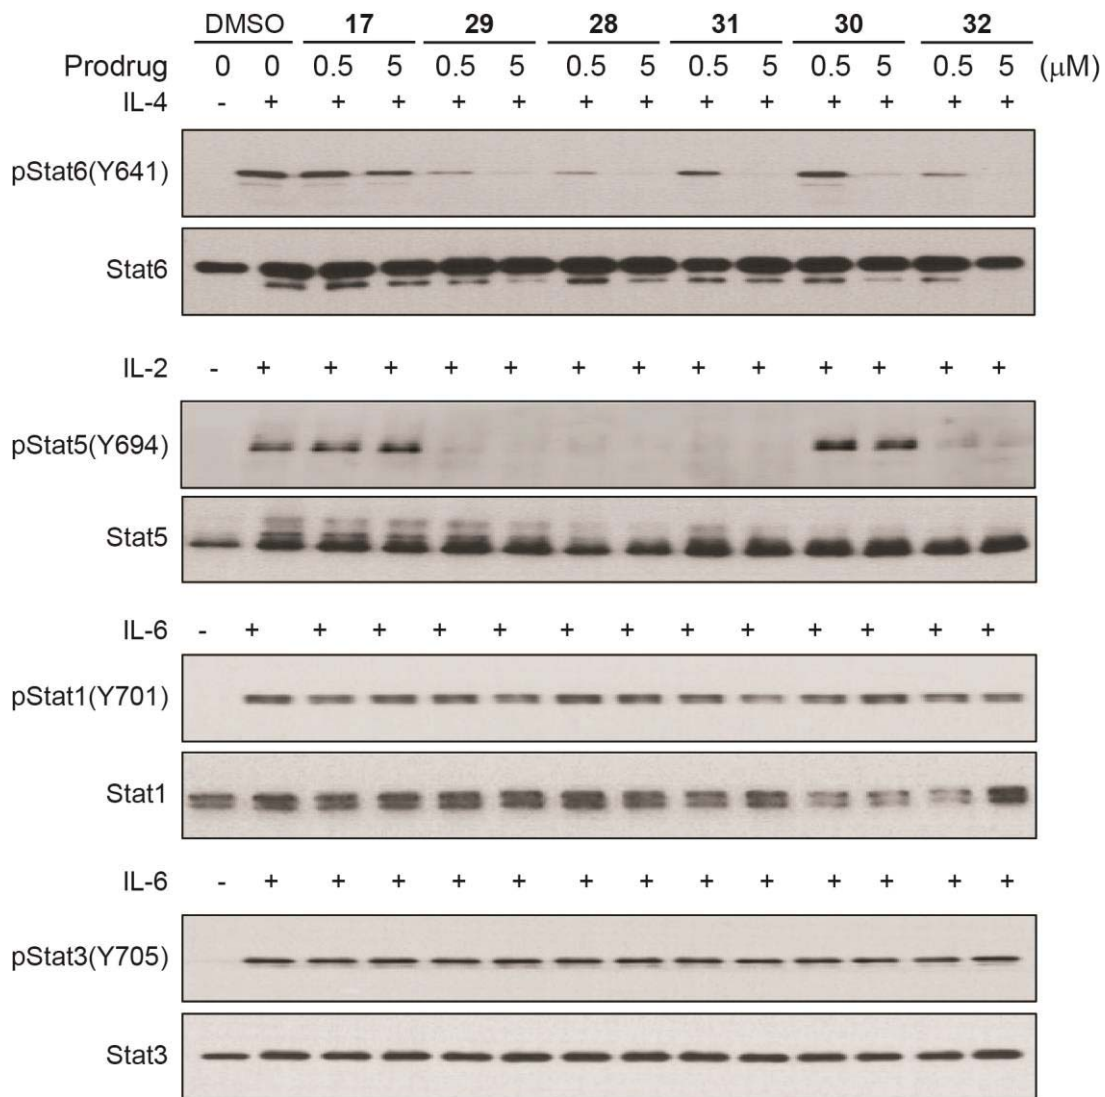

**Figure S2.** Inhibition of STAT proteins in CD4<sup>+</sup> T lymphocytes from C57BL/6J mice. CD4<sup>+</sup> T cells isolated from C57BL/6J mice were pre-treated with STAT6 inhibitors for 2 hours and activated with plate-bound anti-CD3/anti-CD28 in the presence or absence of indicated cytokines for 15 minutes. The whole cell lysate was subjected to western blot assay to detect the levels of phosphorylated and total STAT6, STAT5, STAT1 and STAT3.

NMR of Compound **19c**

<sup>1</sup>H NMR (CDCl<sub>3</sub>, 500 MHz)

*Trans* :*cis* based on integration of the Tle CH<sub>α</sub>, Pro CH<sub>α</sub>, and Cinn CH<sub>α</sub> resonances

*Trans* isomer, 83%

|       | αNH  | αCH  | βCH <sub>2</sub>        | γCH <sub>2</sub> | δCH <sub>2</sub> | Arom       | NCH <sub>3</sub> | NPh     |
|-------|------|------|-------------------------|------------------|------------------|------------|------------------|---------|
| Cinn  |      | 6.50 | 2.42 (CH <sub>3</sub> ) |                  |                  | 7.17, 7.49 |                  |         |
| Tle   | 7.97 | 4.59 |                         | 1.01             |                  |            |                  |         |
| Pro   |      | 4.19 | 1.97, 1.76              | 1.96, 1.73       | 3.76, 3.63       |            |                  |         |
| NMePh |      |      |                         |                  |                  |            | 3.15             | 7.3-7.5 |

NOE

*Cis* isomer, 17%

|       | αNH  | αCH  | βCH <sub>2</sub> | γCH <sub>2</sub> | δCH <sub>2</sub> | Arom       | NCH <sub>3</sub> | NPh     |
|-------|------|------|------------------|------------------|------------------|------------|------------------|---------|
| Cinn  |      | 6.58 | under DMSO       |                  |                  | 7.19, 7.55 |                  |         |
| Tle   | 7.91 | 4.38 |                  | 0.72             |                  |            |                  |         |
| Pro   |      | 4.27 | 2.10, 1.97       | 1.90, 1.74       | 3.51, 3.34       |            |                  |         |
| NMePh |      |      |                  |                  |                  |            | 3.17             | 7.3-7.5 |

NOE TleCH<sub>α</sub>-ProCH<sub>α</sub>, minor isomer, *cis* Tle-Pro

<sup>13</sup>C NMR (DMSO-*d*<sub>6</sub>, 150 MHz):

δ 16.4, 24.7, 26.0, 26.5, 29.0, 34.9, 35.7, 37.1, 47.9, 55.1, 56.8, 119.7, 119.8, 119.9, 127.1, 127.6,

NMR Characterization of **31**

<sup>1</sup>H NMR (CDCl<sub>3</sub>, 600 MHz)

*Trans*: *cis* ratio based on integration of the Tle NH, Tle CH<sub>2</sub>, Cinn CH<sub>α</sub> and NCH<sub>3</sub> resonances

| <i>Trans</i> isomer, 90% |      |      |                         |                  |                  |            |                  |         |                 |      |
|--------------------------|------|------|-------------------------|------------------|------------------|------------|------------------|---------|-----------------|------|
|                          | αNH  | αCH  | βCH <sub>2</sub>        | γCH <sub>2</sub> | δCH <sub>2</sub> | Arom       | NCH <sub>3</sub> | NPh     | CH <sub>2</sub> | tBu  |
| Cinn                     |      | 6.02 | 2.50 (CH <sub>3</sub> ) |                  |                  | 7.58, 7.47 |                  |         |                 |      |
| Tle                      | 6.39 | 4.78 |                         | 1.12             |                  |            |                  |         |                 |      |
| Pro                      |      | 4.38 | 1.85                    | 2.04, 1.75       | 3.87, 3.73       |            |                  |         |                 |      |
| NMePh                    |      |      |                         |                  |                  |            | 3.27             | 7.3-7.6 |                 |      |
| POM                      |      |      |                         |                  |                  |            |                  |         |                 | 1.22 |
| NOE                      |      |      |                         |                  |                  |            |                  |         |                 |      |

*Cis* isomer, 10%

|       | αNH  | αCH  | βCH <sub>2</sub>        | γCH <sub>2</sub> | δCH <sub>2</sub> | Arom       | NCH <sub>3</sub> | NPh     |  |      |
|-------|------|------|-------------------------|------------------|------------------|------------|------------------|---------|--|------|
| Cinn  |      | 6.11 | 2.52 (CH <sub>3</sub> ) |                  |                  | 7.53, 7.58 |                  |         |  |      |
| Tle   | 6.30 | 4.43 |                         | 1.12             |                  |            |                  |         |  |      |
| Pro   |      | 4.36 | 2.06                    | 2.09, 1.79       | 3.80, 3.50       |            |                  |         |  |      |
| NMePh |      |      |                         |                  |                  |            | 3.31             | 7.3-7.6 |  |      |
| POM   |      |      |                         |                  |                  |            |                  |         |  | 1.22 |

<sup>13</sup>C NMR (CDCl<sub>3</sub>, 150 MHz) δ:

17.6, 25.2, 26.6, 26.8, 29.6, 36.2, 37.7, 38.7, 48.8, 56.7, 57.7, 82.4, 121.2, 126.4, 126.5, 127.7, 127.9, 128.0, 129.8, 143.4, 145.5, 149.9, 165.9, 169.8, 171.7, 176.6

Resonances from the *cis* isomer were not distinguishable from those of the *trans*.
